# Supplementary material for: Hyperbranched copper phthalocyanine decorated Fe3O4 microspheres with extraordinary microwave absorption properties
Source: Royal Society of Chemistry journal article supplement (doi:10.1039/c4ra12443j), 2014-12-08
Supplement: c4ra12443j1.pdf [file c4ra12443j1.pdf]

## Supporting Information

### **Hyperbranched copper phthalocyanine decorated Fe<sub>3</sub>O<sub>4</sub> microspheres with extraordinary microwave absorption properties**

Fanbin Meng and Xiaobo Liu\*

Research Branch of Functional Polymer Composites, Institute of Microelectronic & Solid State Electronic, University of Electronic Science and Technology of China, Chengdu 610054, P. R. China  
E-mail: liuxb@uestc.edu.cn

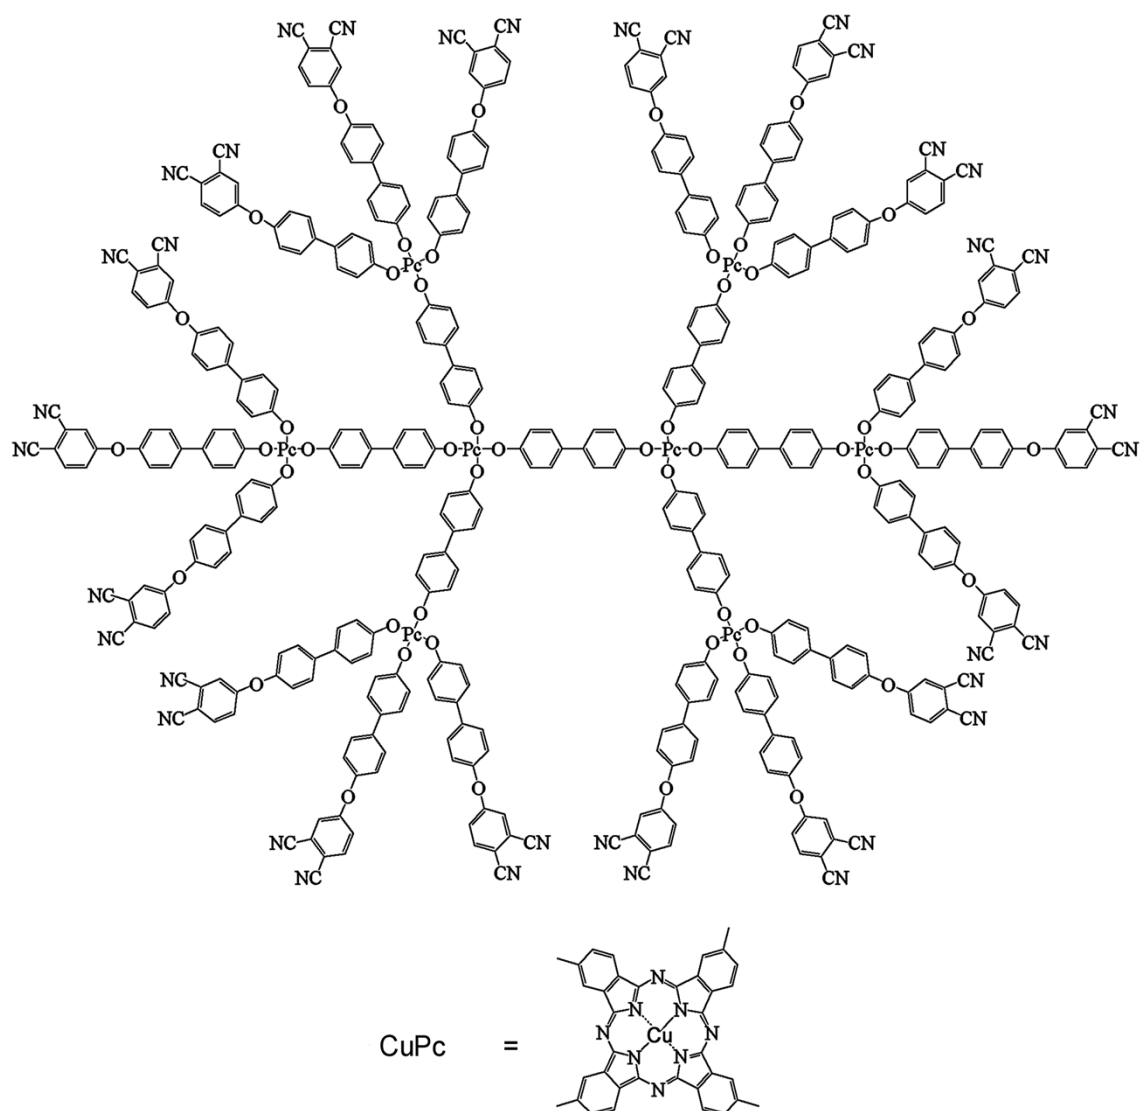

Scheme S1. Chemical Structure of the HBCuPc

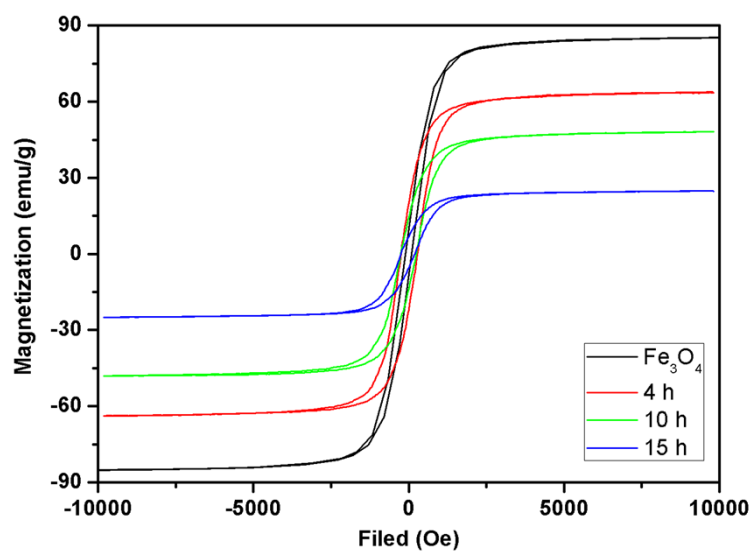

Figure S1. Magnetization curves applied magnetic field at room temperature of Fe<sub>3</sub>O<sub>4</sub> and Fe<sub>3</sub>O<sub>4</sub>/HBCuPc composites with different treatment time

Table S1 Magnetization data for Fe<sub>3</sub>O<sub>4</sub>/HBCuPc with different treatment time

| Sample                                              | Hc (Oe) | Ms (emu g <sup>-1</sup> ) |
|-----------------------------------------------------|---------|---------------------------|
| Fe <sub>3</sub> O <sub>4</sub>                      | 188.3   | 82.7                      |
| Fe <sub>3</sub> O <sub>4</sub> /HBCuPc-treated 5h   | 247.1   | 63.5                      |
| Fe <sub>3</sub> O <sub>4</sub> /HBCuPc-treated 10 h | 242.5   | 48.1                      |
| Fe <sub>3</sub> O <sub>4</sub> /HBCuPc-treated 15h  | 240.4   | 24.7                      |

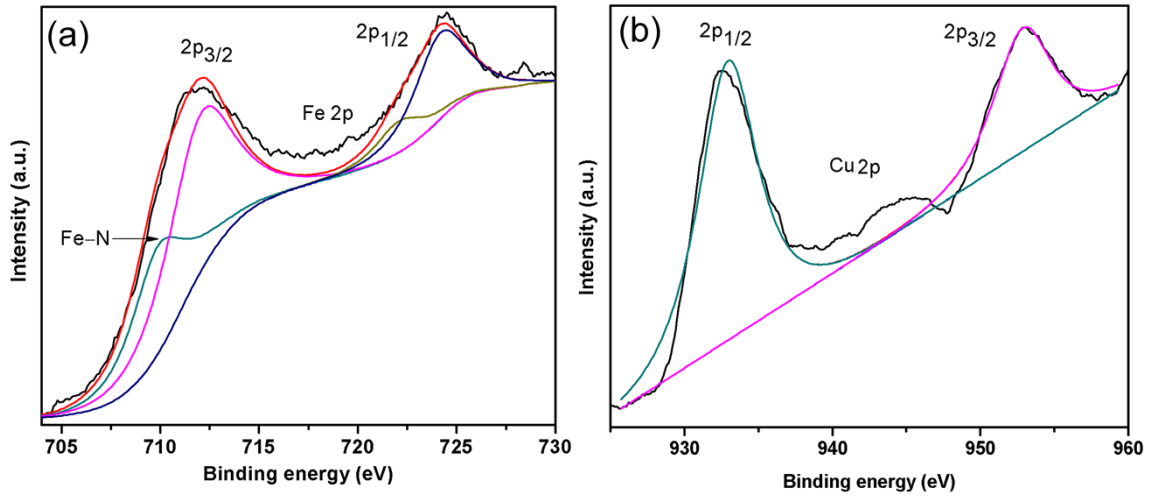

Figure S2. XPS spectra of Fe 2p (a) and Cu 2p (b) for Fe<sub>3</sub>O<sub>4</sub>/HBCuPc

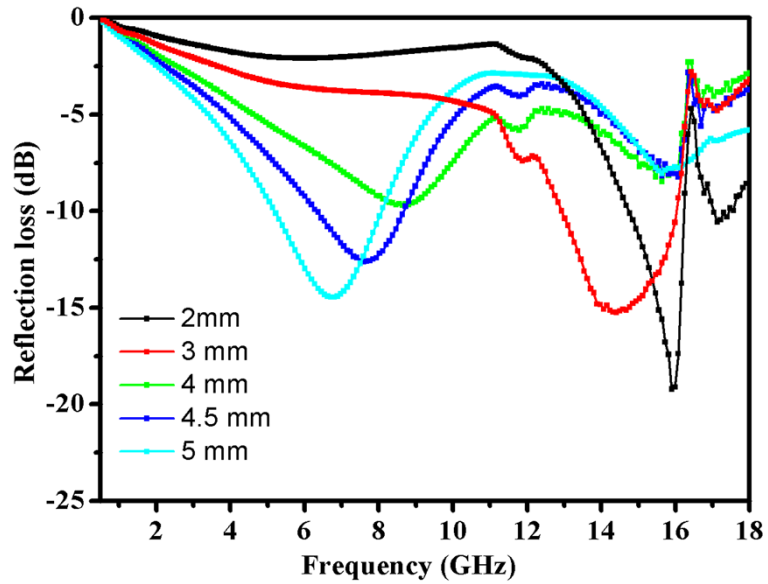

Figure S3. The reflection losses of Fe<sub>3</sub>O<sub>4</sub> in different thickness of Fe<sub>3</sub>O<sub>4</sub>.

Table S2 Absorption properties of the Fe<sub>3</sub>O<sub>4</sub>-based magnetic materials

| phase composition                                             | optimum thickness<br>(mm) | optimum frequency<br>(GHz) | R <sub>Lmax</sub><br>(dB) | absorption bandwidth<br>( <-10 dB, GHz) |
|---------------------------------------------------------------|---------------------------|----------------------------|---------------------------|-----------------------------------------|
| Fe <sub>3</sub> O <sub>4</sub> /PEDOT <sup>1</sup>            | 4                         | 9.5                        | -30                       | 4                                       |
| Fe <sub>3</sub> O <sub>4</sub> /r-GO <sup>2</sup>             | 2                         | 12.9                       | -24                       | 4.9                                     |
| Fe <sub>3</sub> O <sub>4</sub> /TiO <sub>2</sub> <sup>3</sup> | 5                         | 17.3                       | -20.6                     | 3                                       |
| Fe <sub>3</sub> O <sub>4</sub> /SnO <sub>2</sub> <sup>4</sup> | 4                         | 16.7                       | -27.4                     | 5                                       |
| Fe <sub>3</sub> O <sub>4</sub> /PPy <sup>5</sup>              | 2.3                       | 12.9                       | -22.4                     | 5                                       |
| Fe <sub>3</sub> O <sub>4</sub> /CuPc <sup>6</sup>             | 2.6                       | 12.6                       | -35                       | 2                                       |

1 Zhou, W. C.; Hu, X. J.; Bai, X. X.; Zhou, X. Y.; Sun, C. H.; Yan, J.; Chen, P. *ACS Appl. Mater. Inter.* **2011**, *3*, 3839–3845

2 Xu, H. L.; Bi, H.; Yang, R. B. *J. Appl. Phys.* **2012**, *111*, 07A522-1–07A522-3.

3 Zhu, C. L.; Zhang, M. L.; Qiao, Y. J.; Xiao, G.; Zhang, F.; Chen, Y. J. *J. Phys. Chem. C*, **2010**, *114*, 16229–16235

4 Chen, Y. J.; Gao, P.; Wang, R. X.; Zhu, C. L.; Wang, L. J.; Cao, M. S.; Jin, H. B. *J. Phys. Chem. C*. **2009**, *113*, 10061–10064.

5 Lia, Y. B.; Chen, G.; Li, Q. H.; Qiu, G. Z.; Liu, X. H. *J. Alloy. Compd.* 2011, *509*, 4104-4107.

6 Ma, Zhen, Zhao, Rui, Yang, Xulin, Wei, J. J. Wei, Meng, F. B., Liu, X. B. *Mater. Lett.*, 2012, *69*, 30–33.

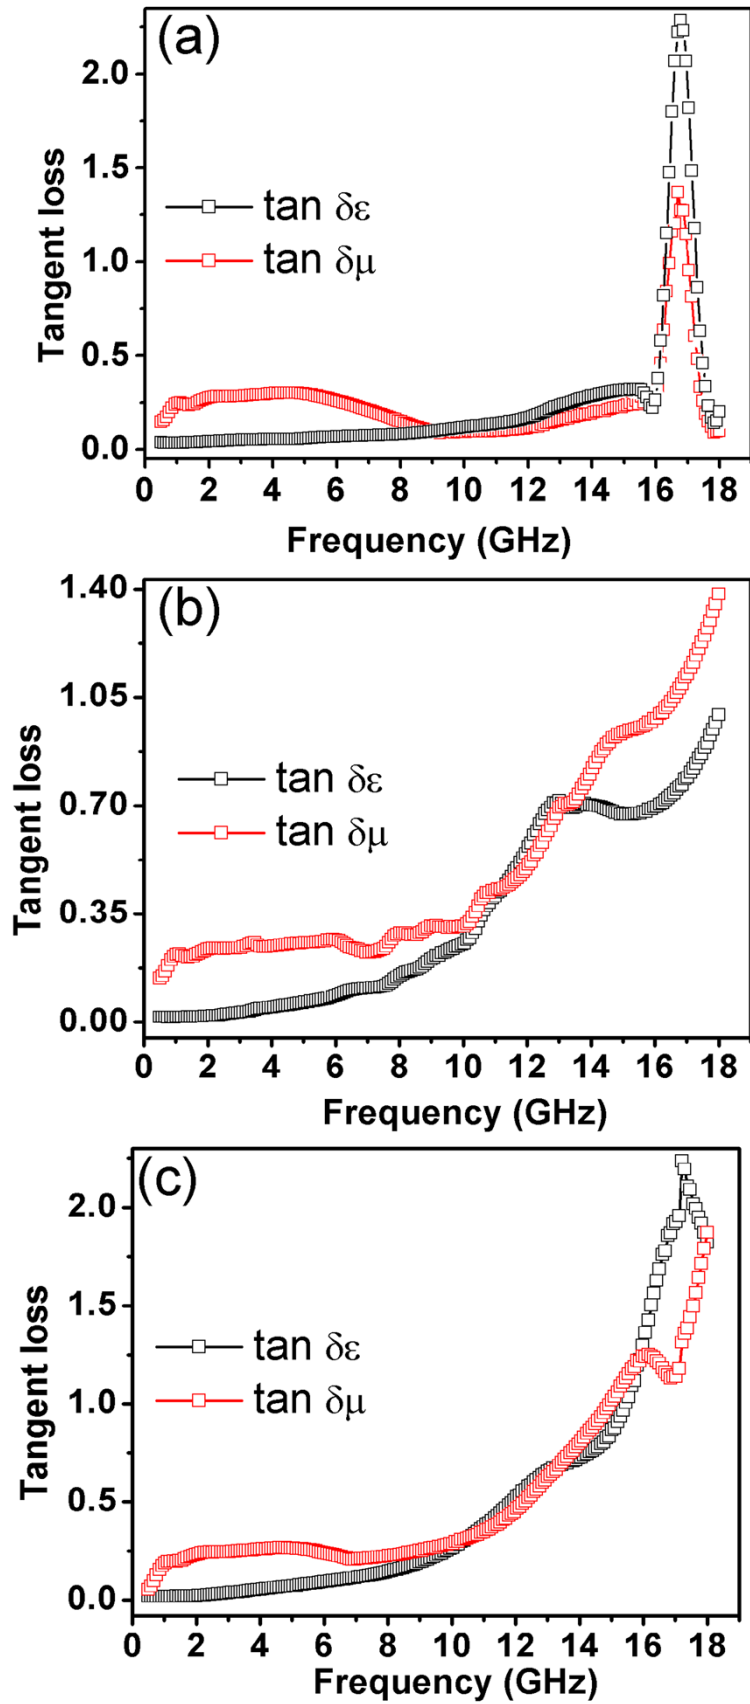

Figure S4. The relationships between  $\tan \delta\epsilon$  and  $\tan \delta\mu$  of Fe<sub>3</sub>O<sub>4</sub>/HBCuPc with different treatment time (a) 5 h, (b) 10 h and (c) 15 h
